# Supplementary material for: Metal cofactor level chassis engineering enables aerobic expression of tungsten formate dehydrogenases in Escherichia coli
Source: Research Square preprint supplement (doi:10.21203/rs.3.rs-8913862/v1), 2026-02-23
Supplement: Supplementary file 1 [file 4ff5bb97477c45024e0bfc72.docx]

Supplementary Information

**Metal cofactor‑level chassis engineering enables aerobic expression of tungsten formate dehydrogenases in Escherichia coli**

*Uyen Thu Phan1,†, Jun-Min Lee2,†, Toan Minh Vo1, Min-Kyu Oh2,*,Yong Hwan Kim1,3,**

1 School of Energy and Chemical Engineering, Ulsan National Institute of Science and Technology, Ulsan 44919, Republic of Korea

2 Department of Chemical & Biological Engineering, Korea University, Seoul 136-763, Korea

3 Graduate of Carbon Neutrality, Ulsan National Institute of Science and Technology, Ulsan 44919, Republic of Korea

† These authors contributed equally to this work.

* **Correspondence:**

**Min-Kyu Oh**

E-mail: [mkoh@korea.ac.kr](mailto:mkoh@korea.ac.kr)

Tel: +82-2-3290-3308

**Yong Hwan Kim**

E-mail: [metalkim@unist.ac.kr](mailto:metalkim@unist.ac.kr)

Tel: +82-52-217-3068

This PDF file includes:

Tables S1 – S3

Figures S1 – S7

# Table S1. ****Previously characterized genetic requirements for**** MeFDH1 maturation ****in**** Methylorubrum extorquens ****AM1.****

Deletion analyses were performed as part of prior characterization of MeFDH1 maturation in M. extorquens AM1 and are summarized here to define the native W-bis-MGD maturation module.

| Gene | Locus tag / UniProt ID | Functional outcome | Interpretation |
| --- | --- | --- | --- |
| ***moeA1*** | MexAM1_META1p3050 / C5AVW2 | MeFDH1 activity abolished | Required for MeFDH1 maturation |
| *moeA2* | MexAM1_META2p0368 / C5B450 | MeFDH1 activity retained | Not required |
| *moeA3* | MexAM1_META1p3048 / C5AVW0 | MeFDH1 activity retained | Not required |
| *moeA4* | MexAM1_META1p5123 / C5AU28 | MeFDH1 activity retained | Not required |
| *moeA5* | MexAM1_META1p3047 / C5AVV9 | MeFDH1 activity retained | Not required |
| ***mobA*** | MexAM1_META1p5015 / C5ATS0 | No viable deletion mutant obtained | Essential for bis-MGD biosynthesis |
| ***mobB*** | MexAM1_META1p3049 / C5AVW1 | MeFDH1 activity abolished | Required for MeFDH1 maturation |
| ***fdhD*** | MexAM1_META1p3475 / C5AYB3 | MeFDH1 activity abolished | Required for MeFDH1 maturation |

# Table S2. Metal incorporation and enzymatic activity of purified MeFDH1 under different tungstate and molybdate supplementation conditions.

Tungsten and molybdenum incorporation into purified MeFDH1 under tungstate-only (1 mM), mixed-metal (0.5 mM tungstate + 0.5 mM molybdate), and molybdate-only (1 mM) growth conditions. Metal contents were quantified by ICP–MS using the BL1 strain. Values represent mean ± s.d. (n = 3).

| **Culture metal conditions** | **Specific activity**  **(U mg⁻¹ enzyme)** | **Metal content (mol mol⁻¹ enzyme)** | | |
| --- | --- | --- | --- | --- |
| **Fe** | **W** | **Mo** |
| W (1 mM) | 35 ± 3 | 3.89 ± 0.04 | 0.51 ± 0.02 | 0.04 ± 0.07 |
| W (0.5 mM)  + Mo (0.5 mM) | 10 ± 7 | 2.65 ± 0.14 | 0.22 ± 0.15 | 0.05 ± 0.01 |
| Mo (1 mM) | 0.8 ± 1 | 4.12 ± 0.09 | 0.07 ± 0.01 | 0.15 ± 0.08 |

# ****Table S3. Heterologous genes used in this study.****

| Gene | Source organism | GenBank / UniProt ID | Length (aa) | Mass (kDa) | Putative function |
| --- | --- | --- | --- | --- | --- |
| ***fdh1A*** | Methylorubrum extorquens AM1 | MexAM1_META1p5032 / C5ATT7 | 989 | ~107 | Catalytic α subunit of tungsten-dependent formate dehydrogenase (MeFDH1) |
| ***fdh1B*** | M. extorquens AM1 | MexAM1_META1p5031 / C5ATT6 | 572 | ~62 | Electron-transfer β subunit containing multiple Fe–S clusters |
| ***moeA1*** | M. extorquens AM1 | MexAM1_META1p3050 / C5AVW2 | 416 | ~44 | Tungsten-specific insertion factor required for W-bis-MGD biosynthesis |
| ***mobA*** | M. extorquens AM1 | MexAM1_META1p5015 / C5ATS0 | 199 | ~20 | Molybdopterin guanylyltransferase involved in bis-MGD formation |
| ***mobB*** | M. extorquens AM1 | MexAM1_META1p3049 / C5AVW1 | 178 | ~19 | Accessory protein supporting tungsten insertion and cofactor assembly |
| ***fdhD*** | M. extorquens AM1 | MexAM1_META1p3475 / C5AYB3 | 291 | ~31 | Sulfur-transfer chaperone required for FDH maturation |
| ***tupB*** | Sulfitobacter dubius | DSM109990_03773 / A0ABY3ZTD1 | 234 | ~25 | ABC transporter membrane permease (TMD) |
| ***tupC*** | S. dubius | DSM109990_03772 / A0ABY3ZQI9 | 236 | ~26 | ABC transporter ATP-binding protein (NBD) |
| ***tupA*** | S. dubius | DSM109990_03771 / A0ABY3ZRX9 | 270 | ~28 | Periplasmic tungstate-binding protein (substrate-binding component) |
| ***fdwA*** | Cupriavidus necator H16 | H16_B1700 / Q0K0I9 | 938 | ~102 | Catalytic α subunit of tungsten-dependent formate dehydrogenase (FdwAB) |
| ***fdwB*** | C. necator H16 | H16_B1701 / Q0K0I8 | 569 | ~62 | Electron-transfer β subunit of FdwAB |
| ***fdhA*** | Lutibaculum baratangense AMV1 | N177_0493 / V4RN39 | 930 | ~104 | Predicted tungsten-dependent FDH α subunit identified by Foldseek structural homology (LbFDH) |
| ***fdhB*** | L. baratangense AMV1 | N177_0494 / V4RUF5 | 601 | ~66 | Predicted β subunit of LbFDH |


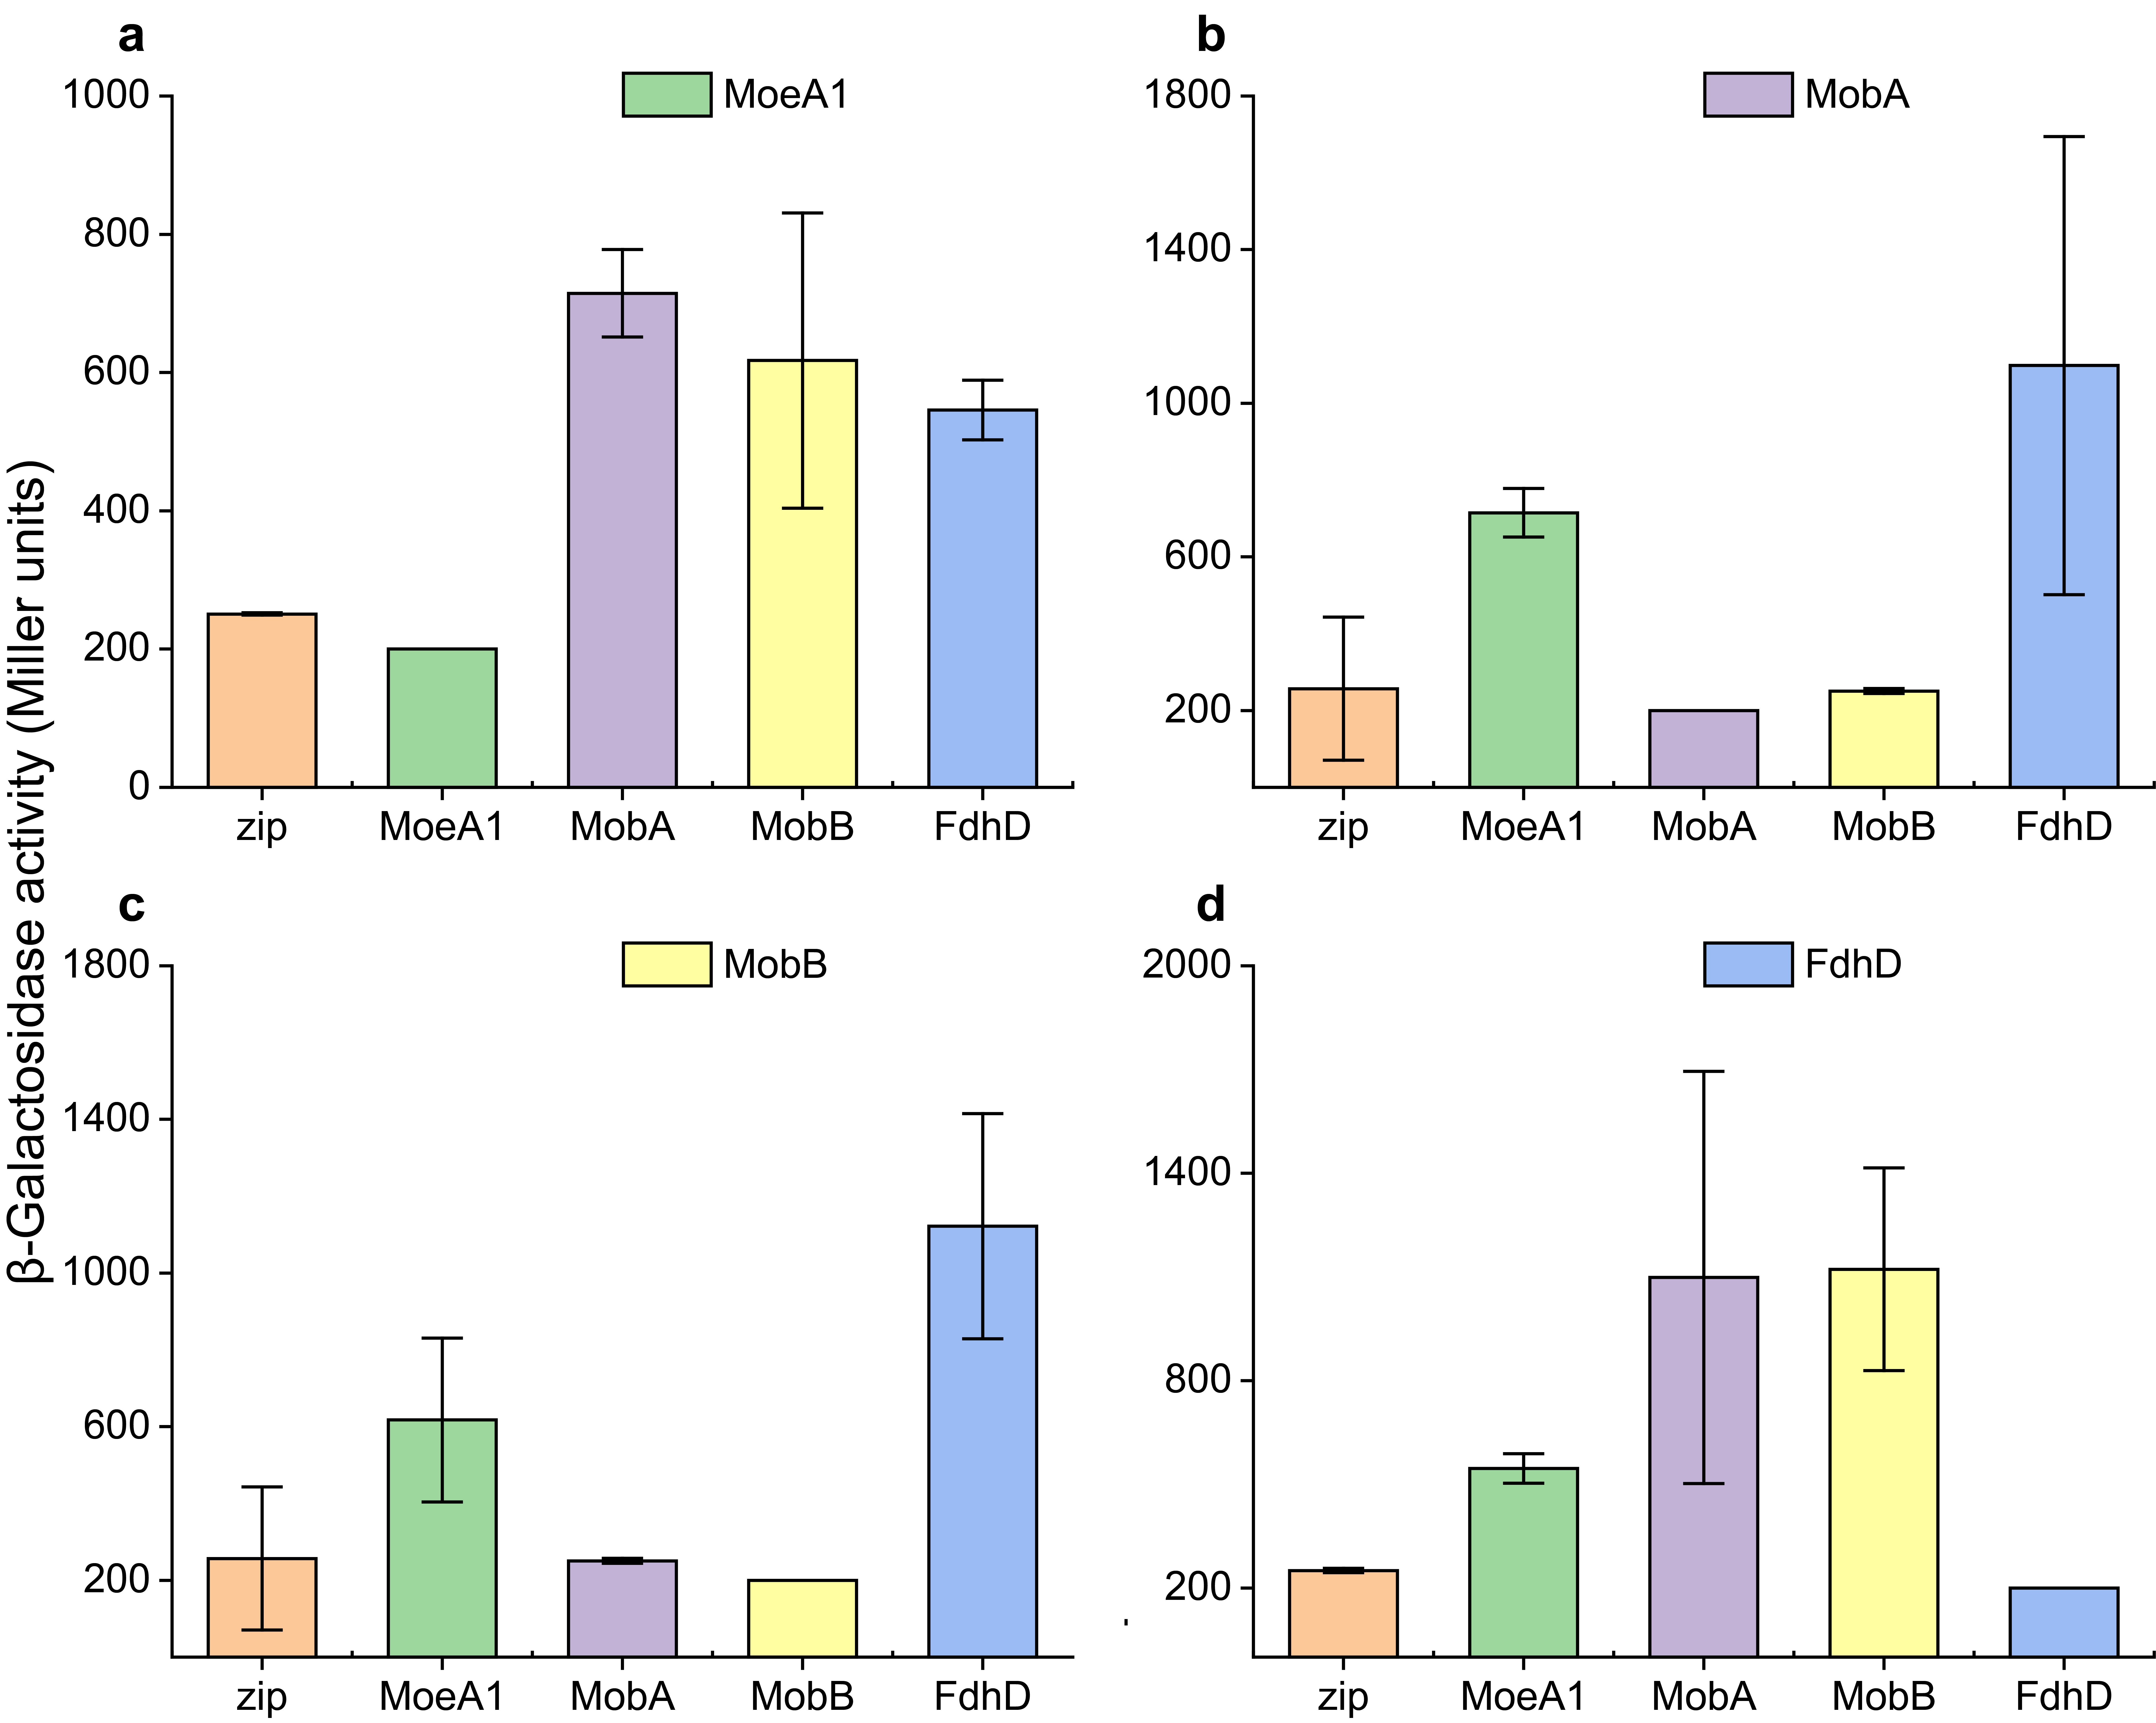


# Figure S1. Pairwise interaction analysis of MoeA1, MobA, MobB, and FdhD using bacterial adenylate cyclase two-hybrid (BACTH) assay.

Quantitative β-galactosidase activities were measured in E. coli BTH101 co-expressing T25 and T18 fusion constructs of Methylorubrum extorquens AM1 proteins. Each panel shows interactions detected when the indicated protein was fused to one adenylate cyclase fragment and co-expressed with the corresponding partner proteins. Reporter activity is expressed in Miller units and presented as mean ± s.d. (n = 3). The leucine zipper (zip) construct was used as a negative control to define baseline background reporter activity. Elevated β-galactosidase activity indicates protein–protein interaction.


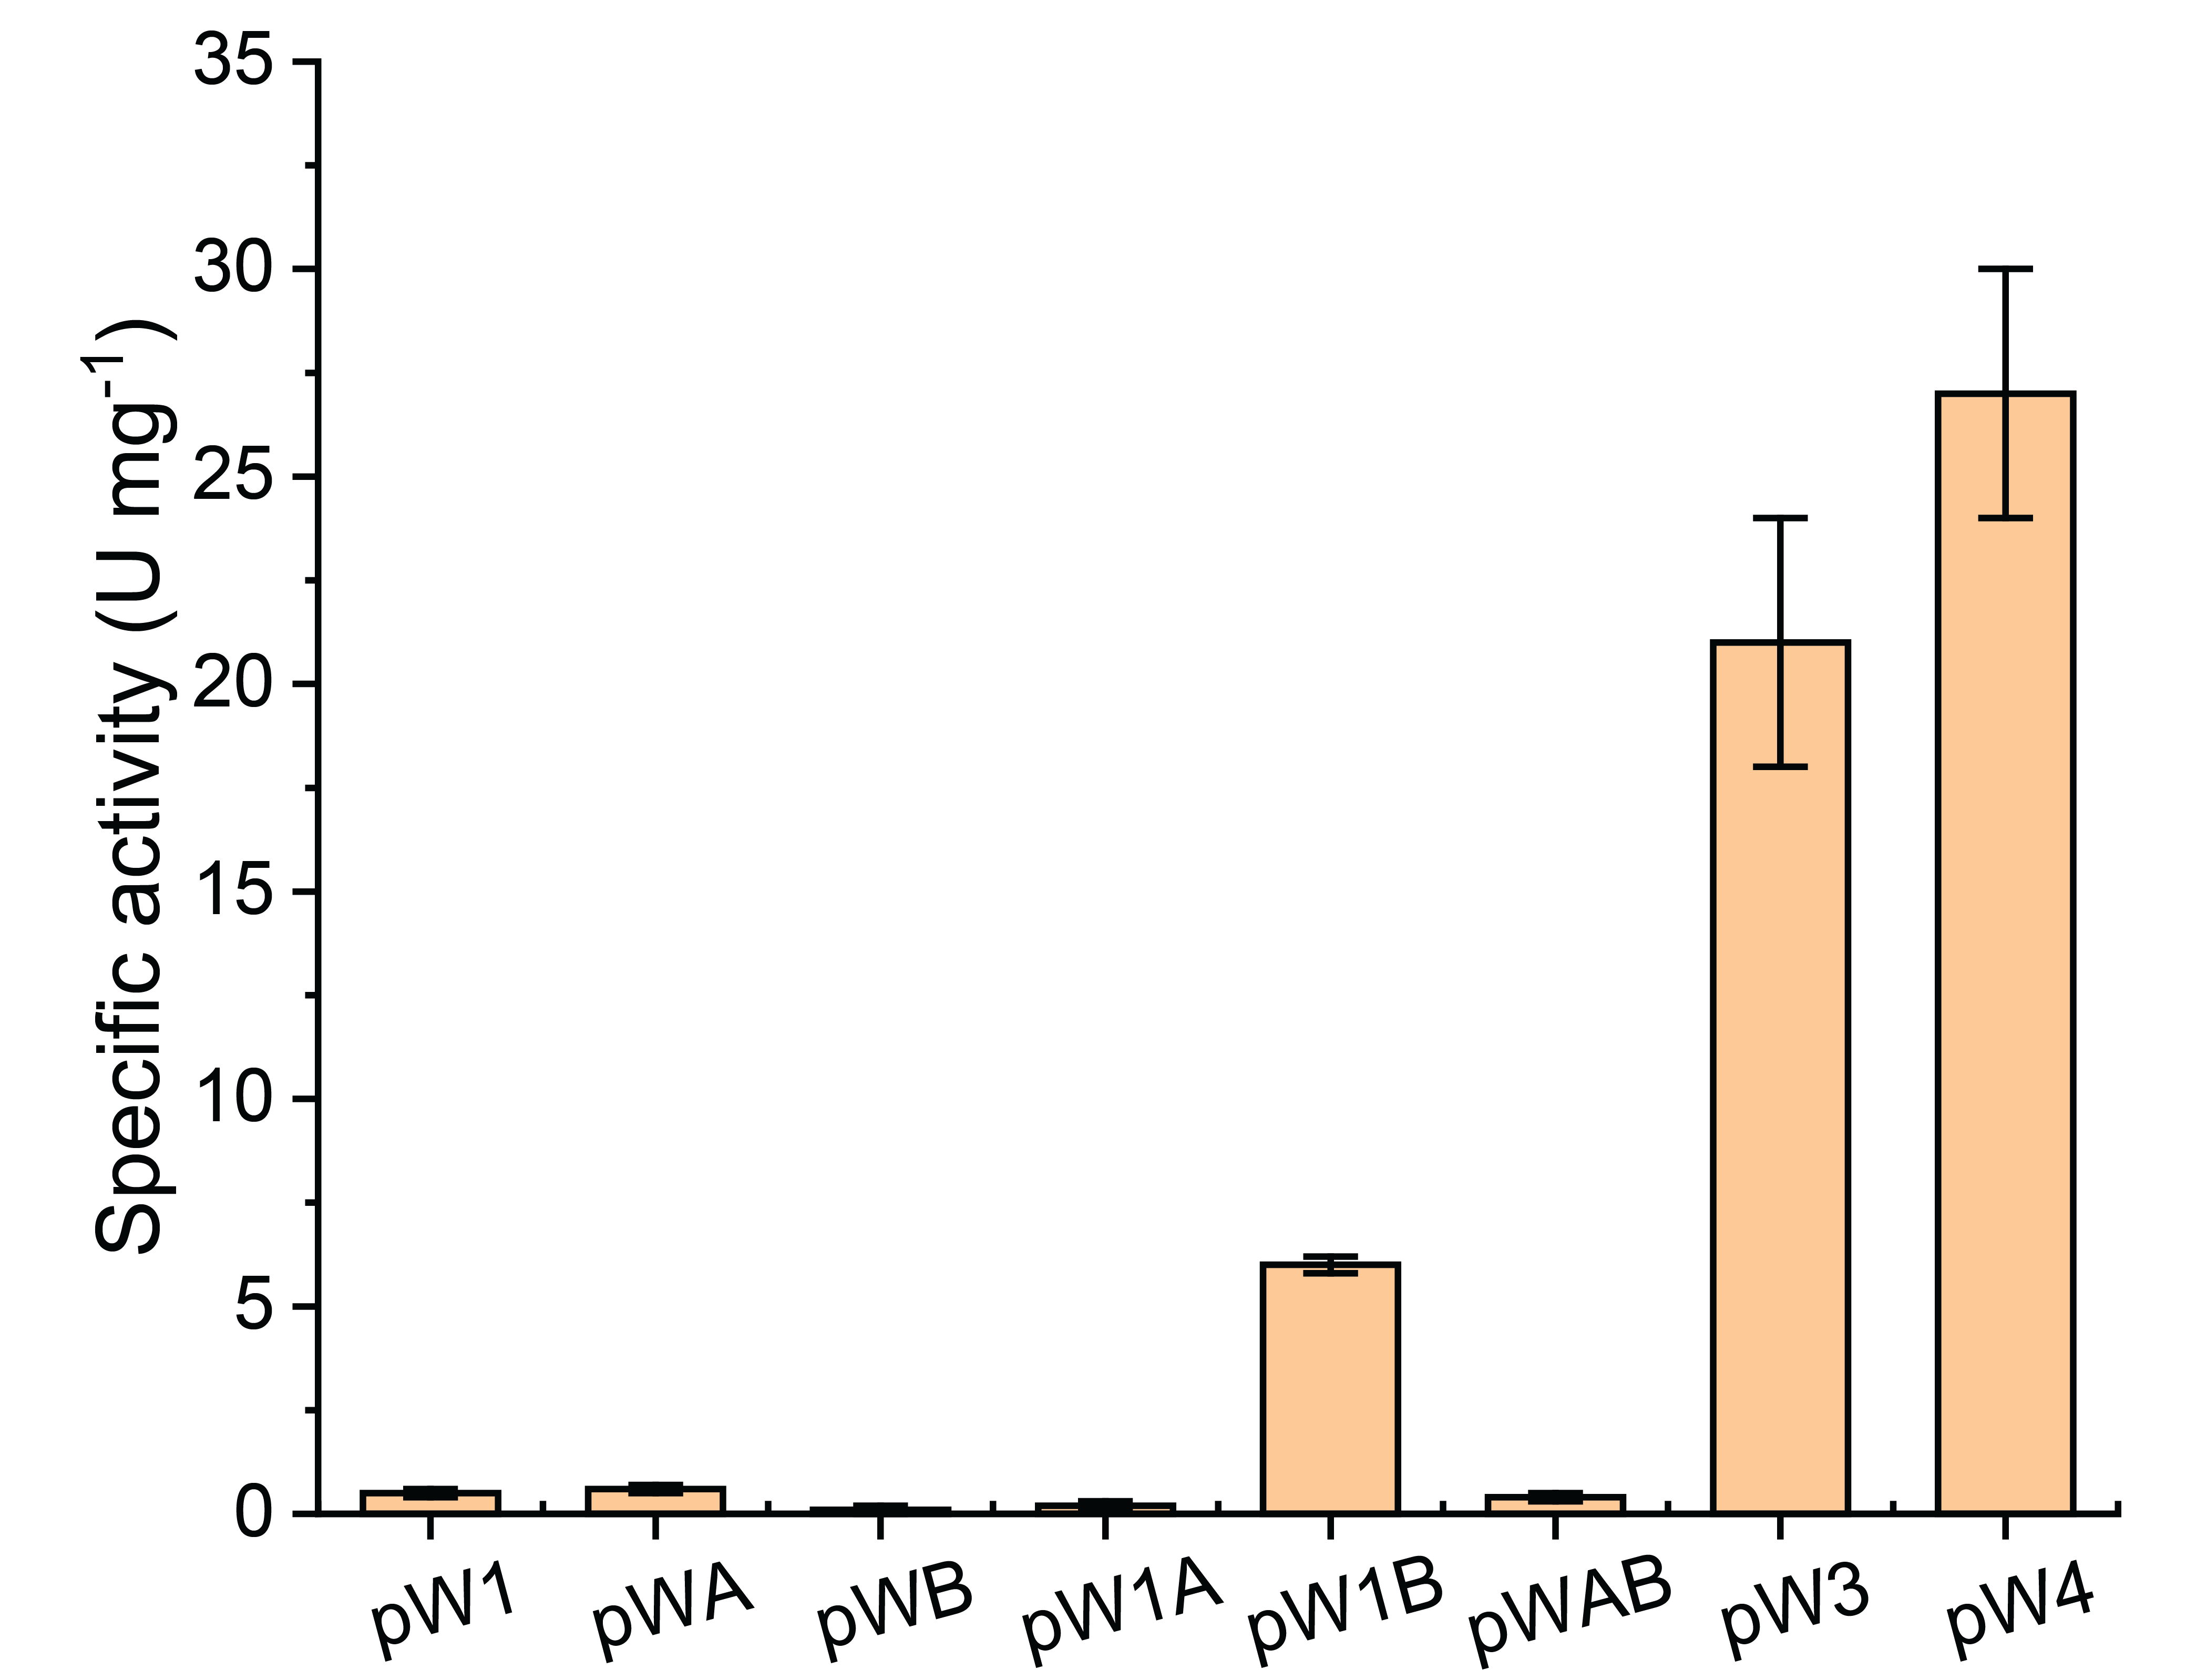


# Figure S2. Specific activity of recombinant MeFDH1 expressed with different combinations of tungsten cofactor biosynthetic genes.

MeFDH1 was expressed in *E. coli* BL21(DE3) together with *M*. *extorquens* AM1 W-cofactor biosynthetic genes supplied on pCDFDuet-1–based plasmids: pW1 (*moeA1*), pWA (*mobA*), pWB (*mobB*), pW1A (*moeA1*–*mobA*), pW1B (*moeA1*–*mobB*), pWAB (*mobA*–*mobB*), pW3 (*moeA1*–*mobA*–*mobB*), and pW4 (*moeA1*–*mobA*–*mobB*–*fdhD*). Bars represent mean ± s.d. (n = 3).

`
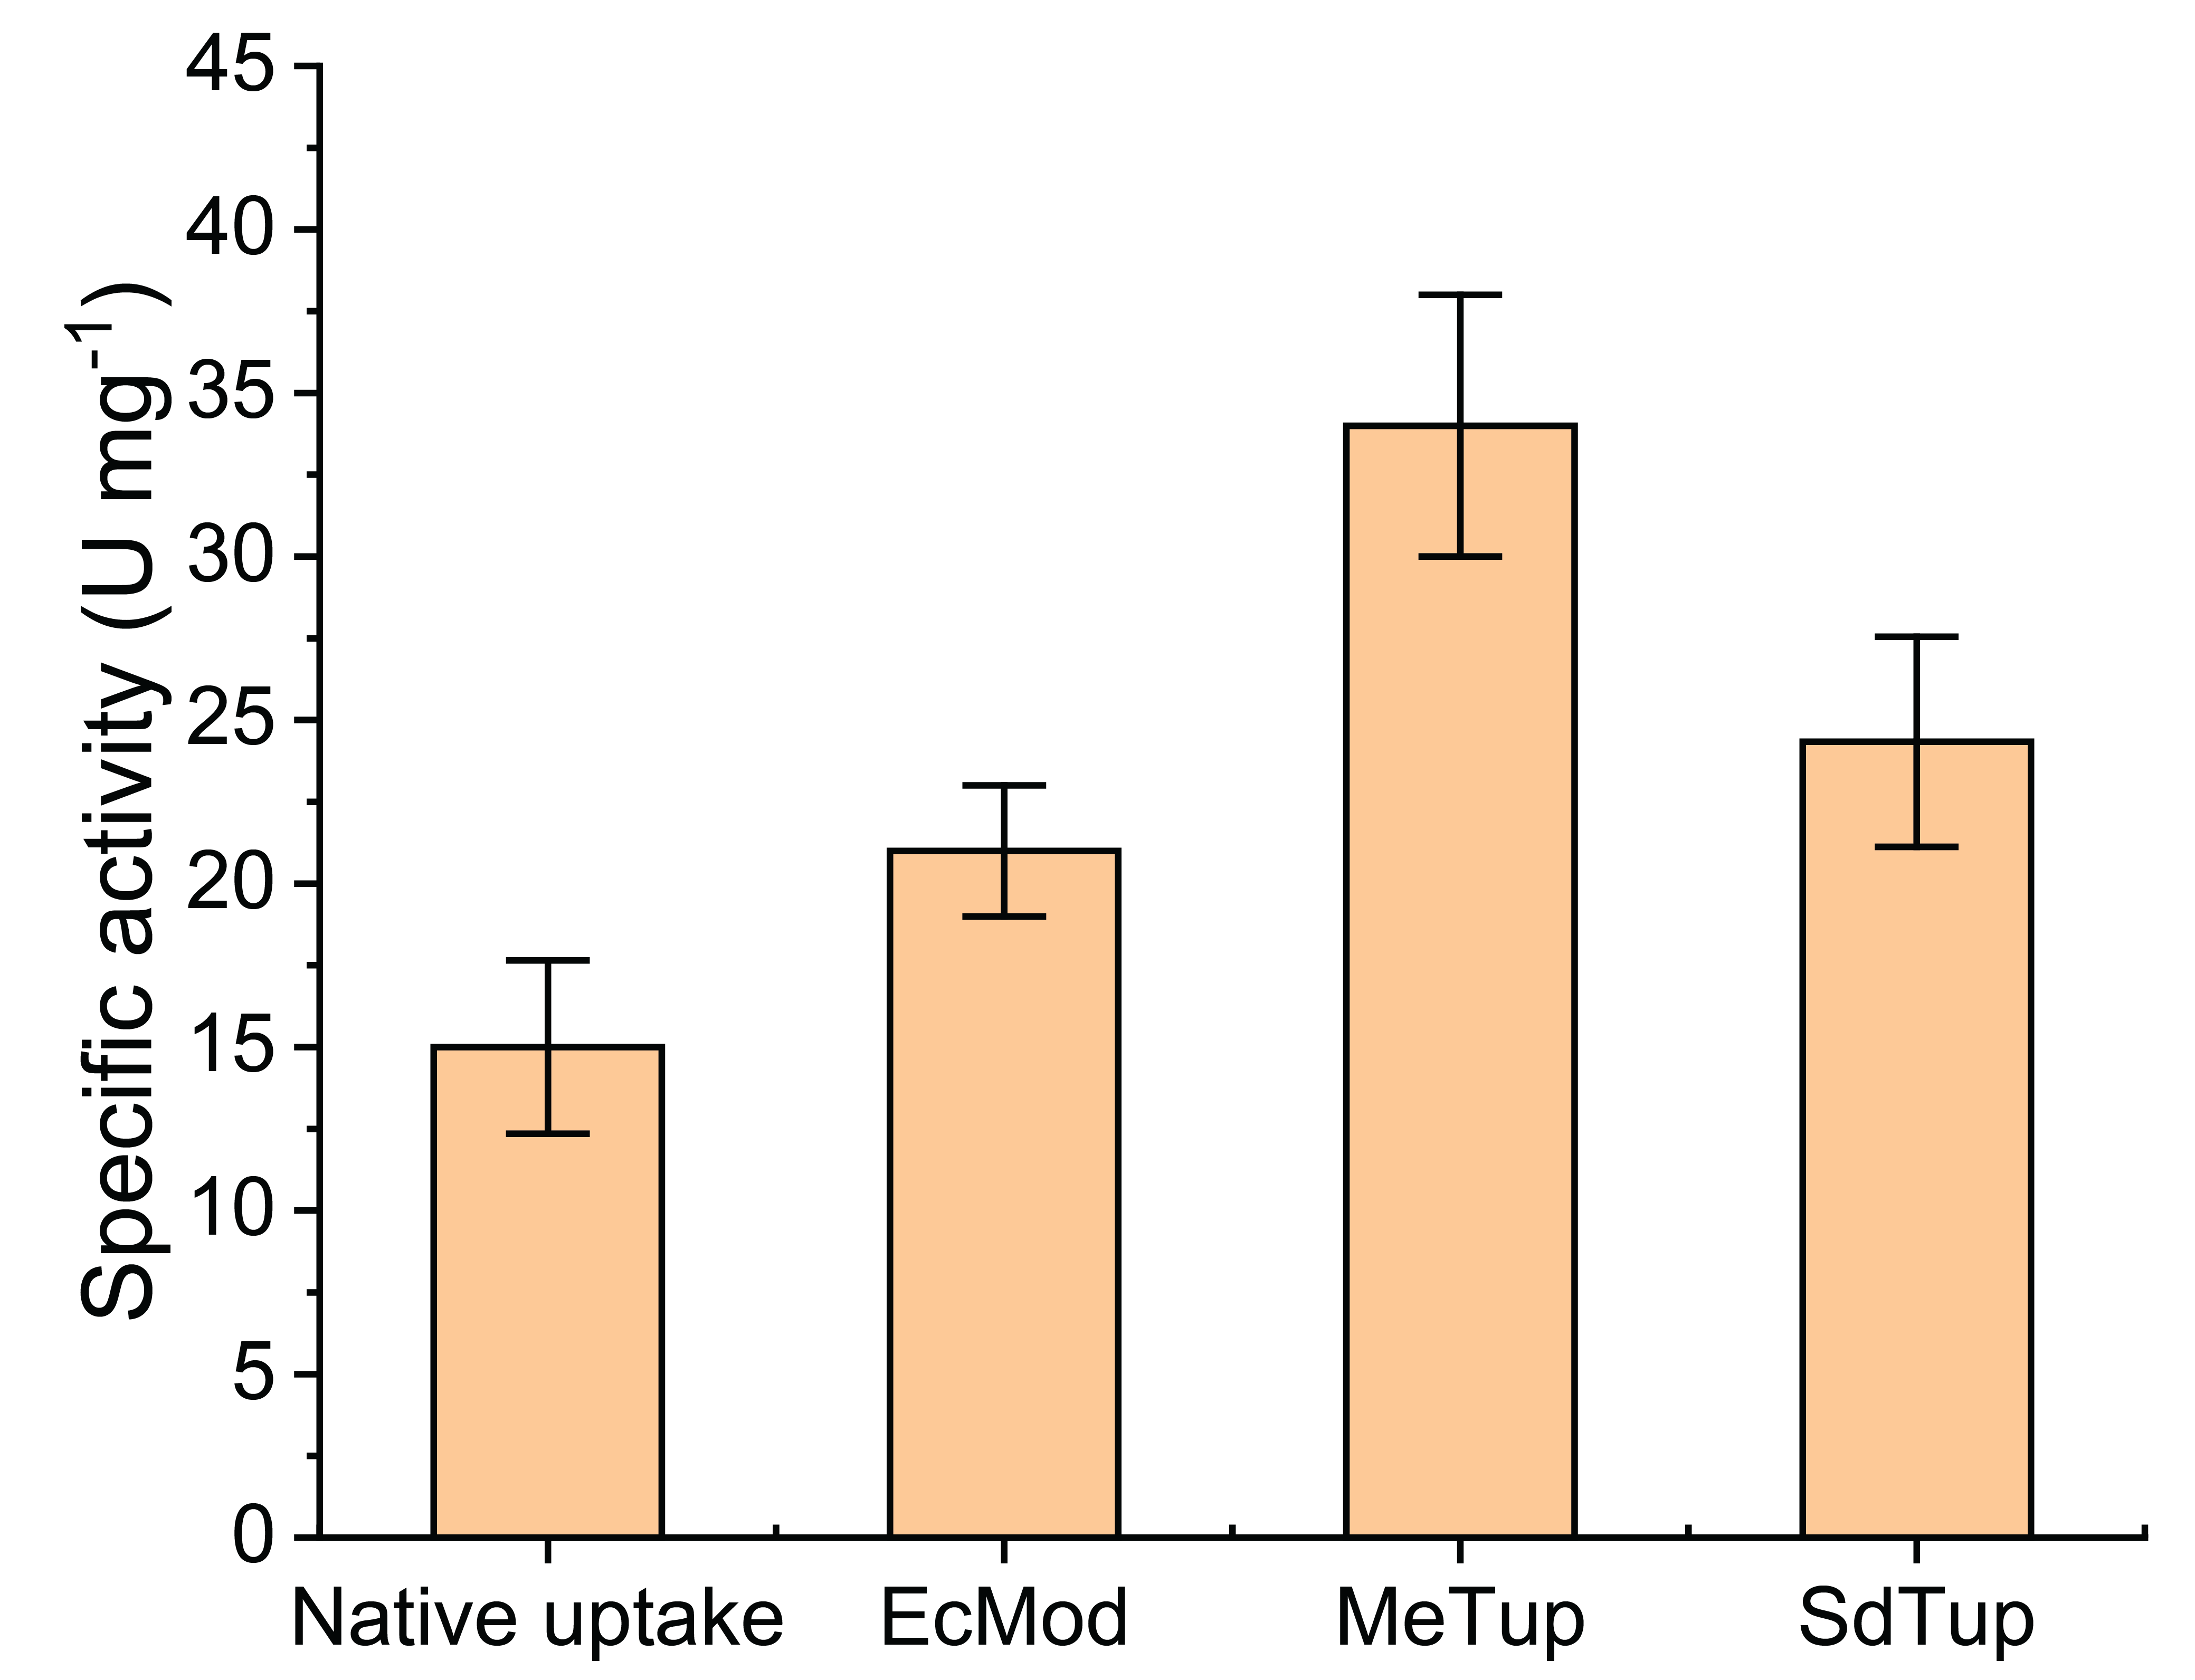


# Figure S3. Effect of tungstate transport systems on MeFDH1 activity.

Recombinant MeFDH1 was expressed in *E. coli* BL21(DE3) together with the W-cofactor biosynthetic module (*moeA1, mobA, mobB and fdhD*) under native uptake (no heterologous tungstate transporter) or in the presence of alternative tungstate transport operons: *modABC* from *E. coli* K-12 (EcMod), *tupBCA* from *Methylorubrum extorquens* AM1 (MeTup), and *tupBCA* from *Sulfitobacter dubius* NA4 (SdTup). Bars represent mean ± s.d. (n = 3).


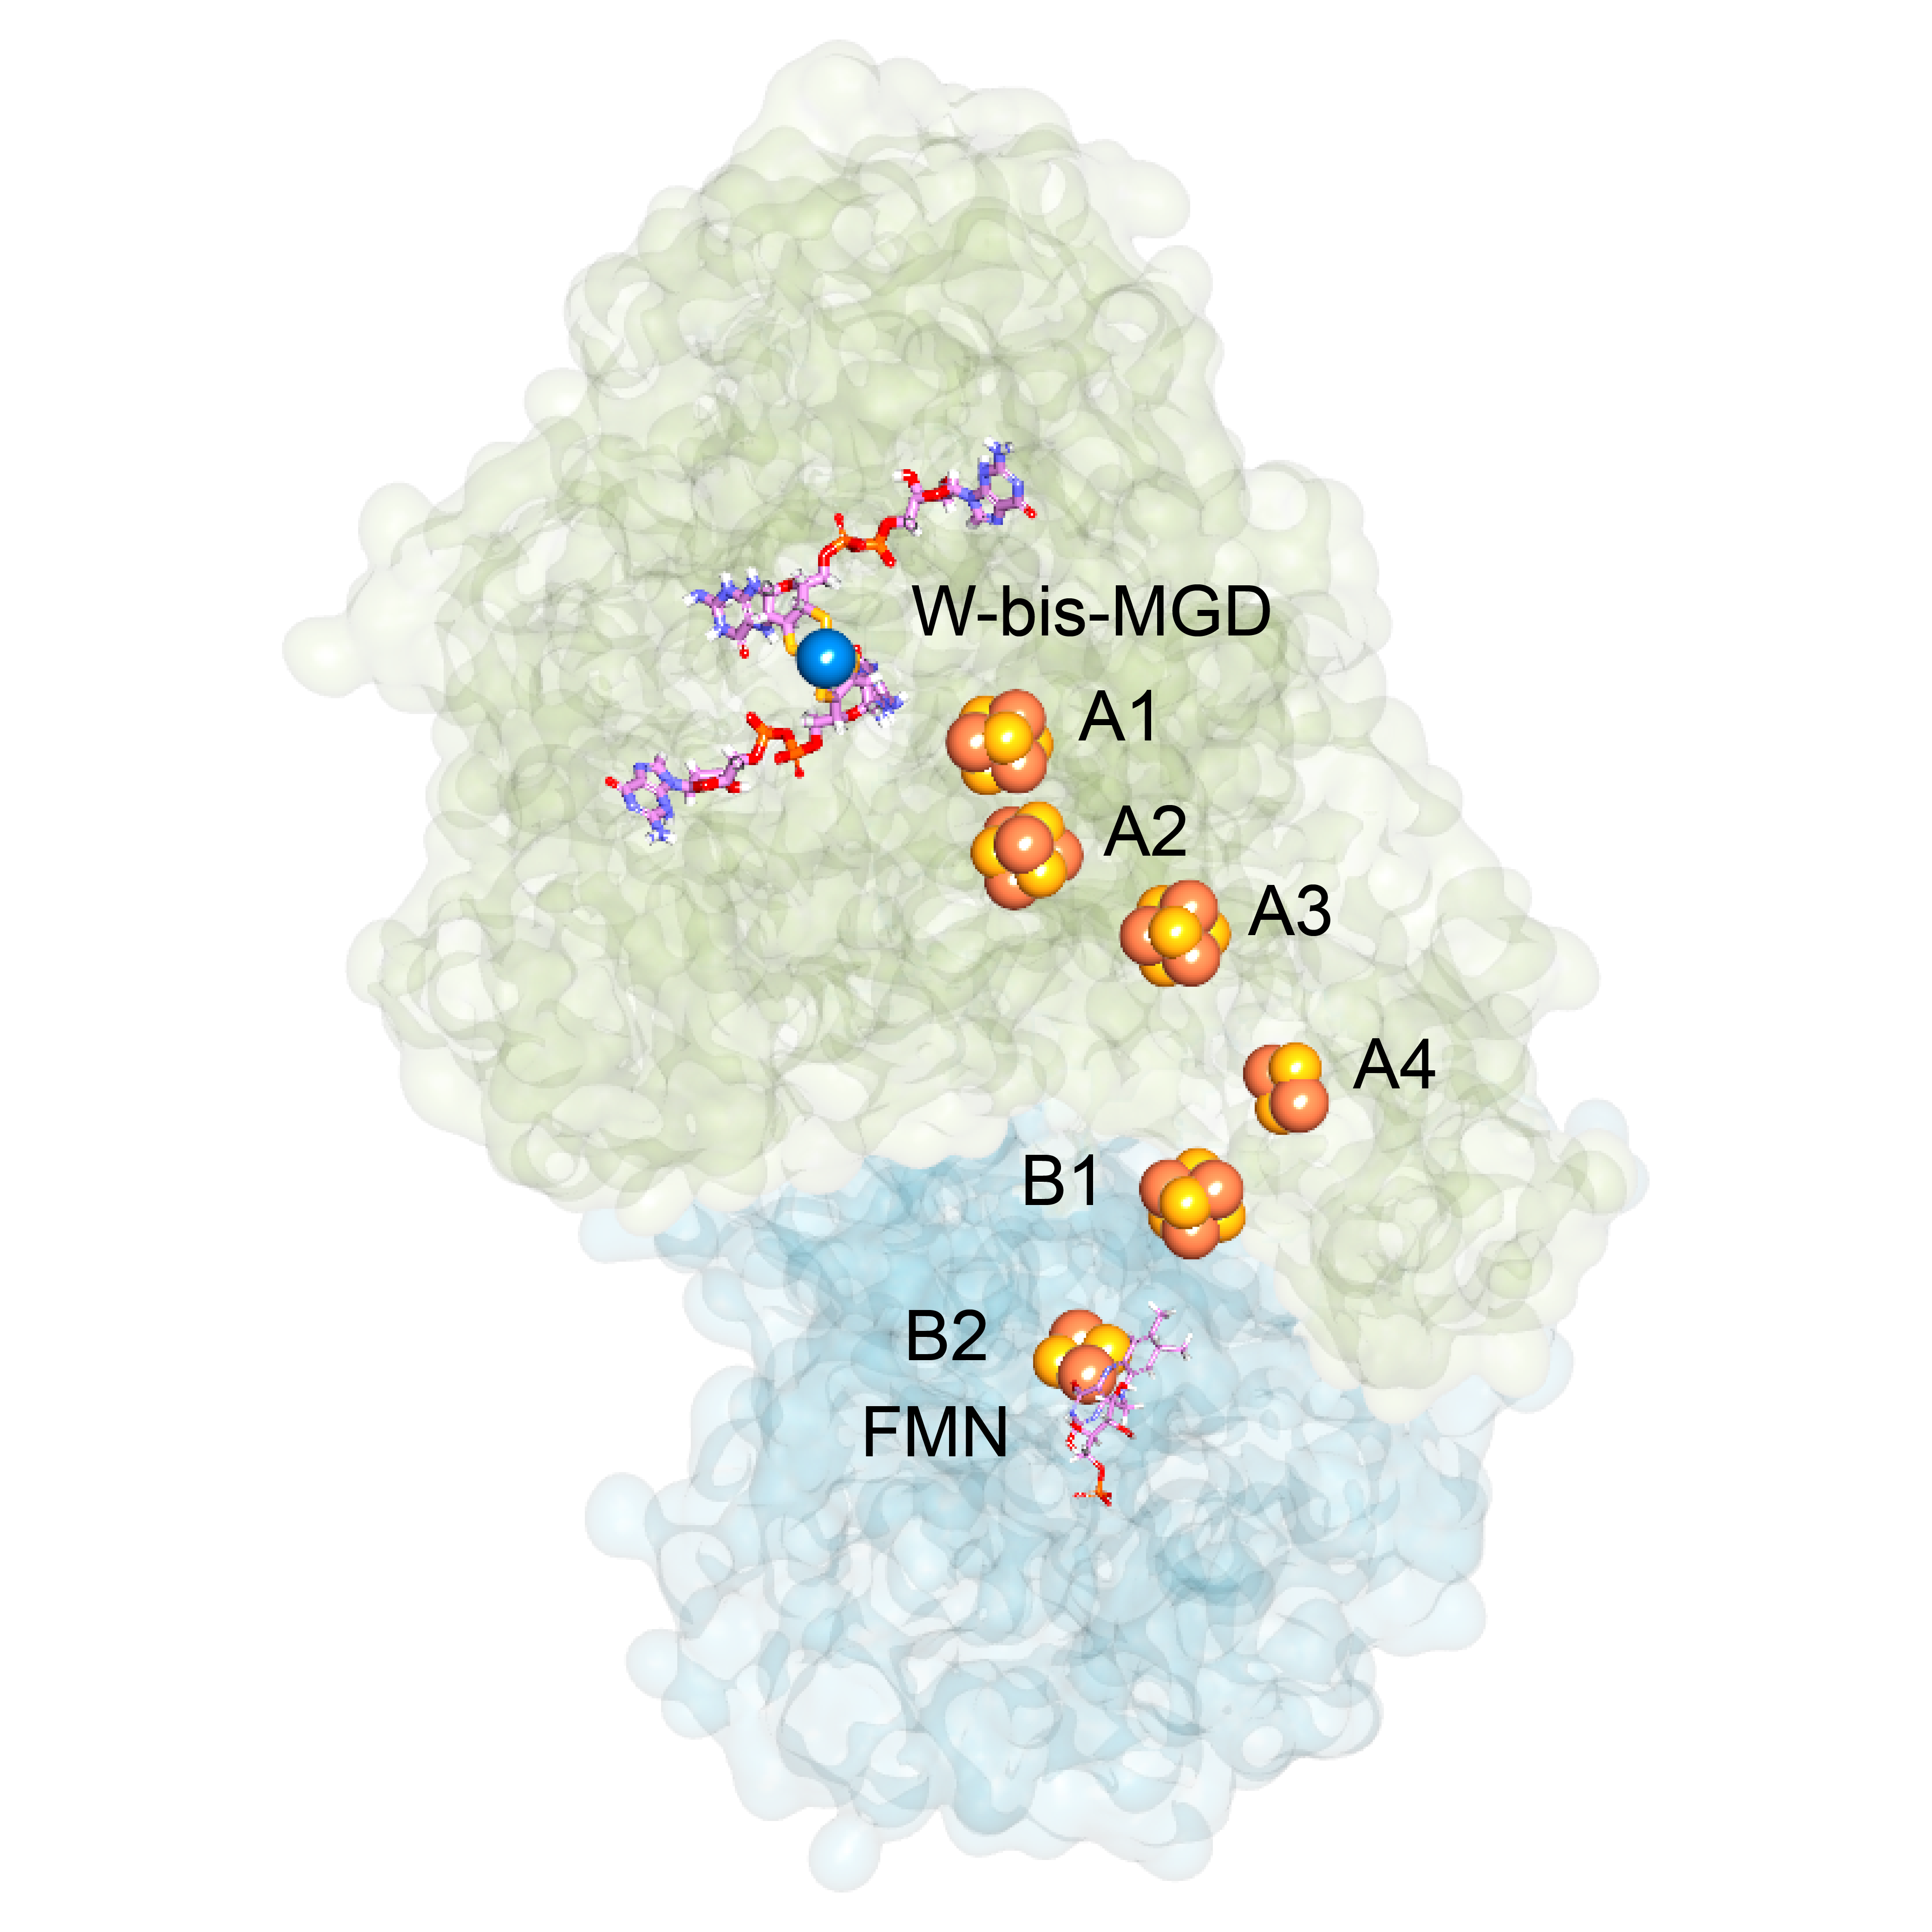


# Figure S4. Distribution of Fe–S clusters within the α and β subunits of MeFDH1 (PDB 8J83).

Surface model of MeFDH1 showing the α-subunit (green) and β-subunit (blue), with all [4Fe–4S] clusters depicted as sphere models. The α-subunit contains three [4Fe–4S] clusters and one [2Fe–2S] cluster. The β-subunit houses an additional [4Fe–4S] and [2Fe–2S] cluster, completing the intramolecular relay. The tungsten–bis-MGD cofactor is shown at the catalytic center of the α-subunit, and the internal relay of Fe–S clusters trace a continuous electron-transfer pathway toward the β-subunit.


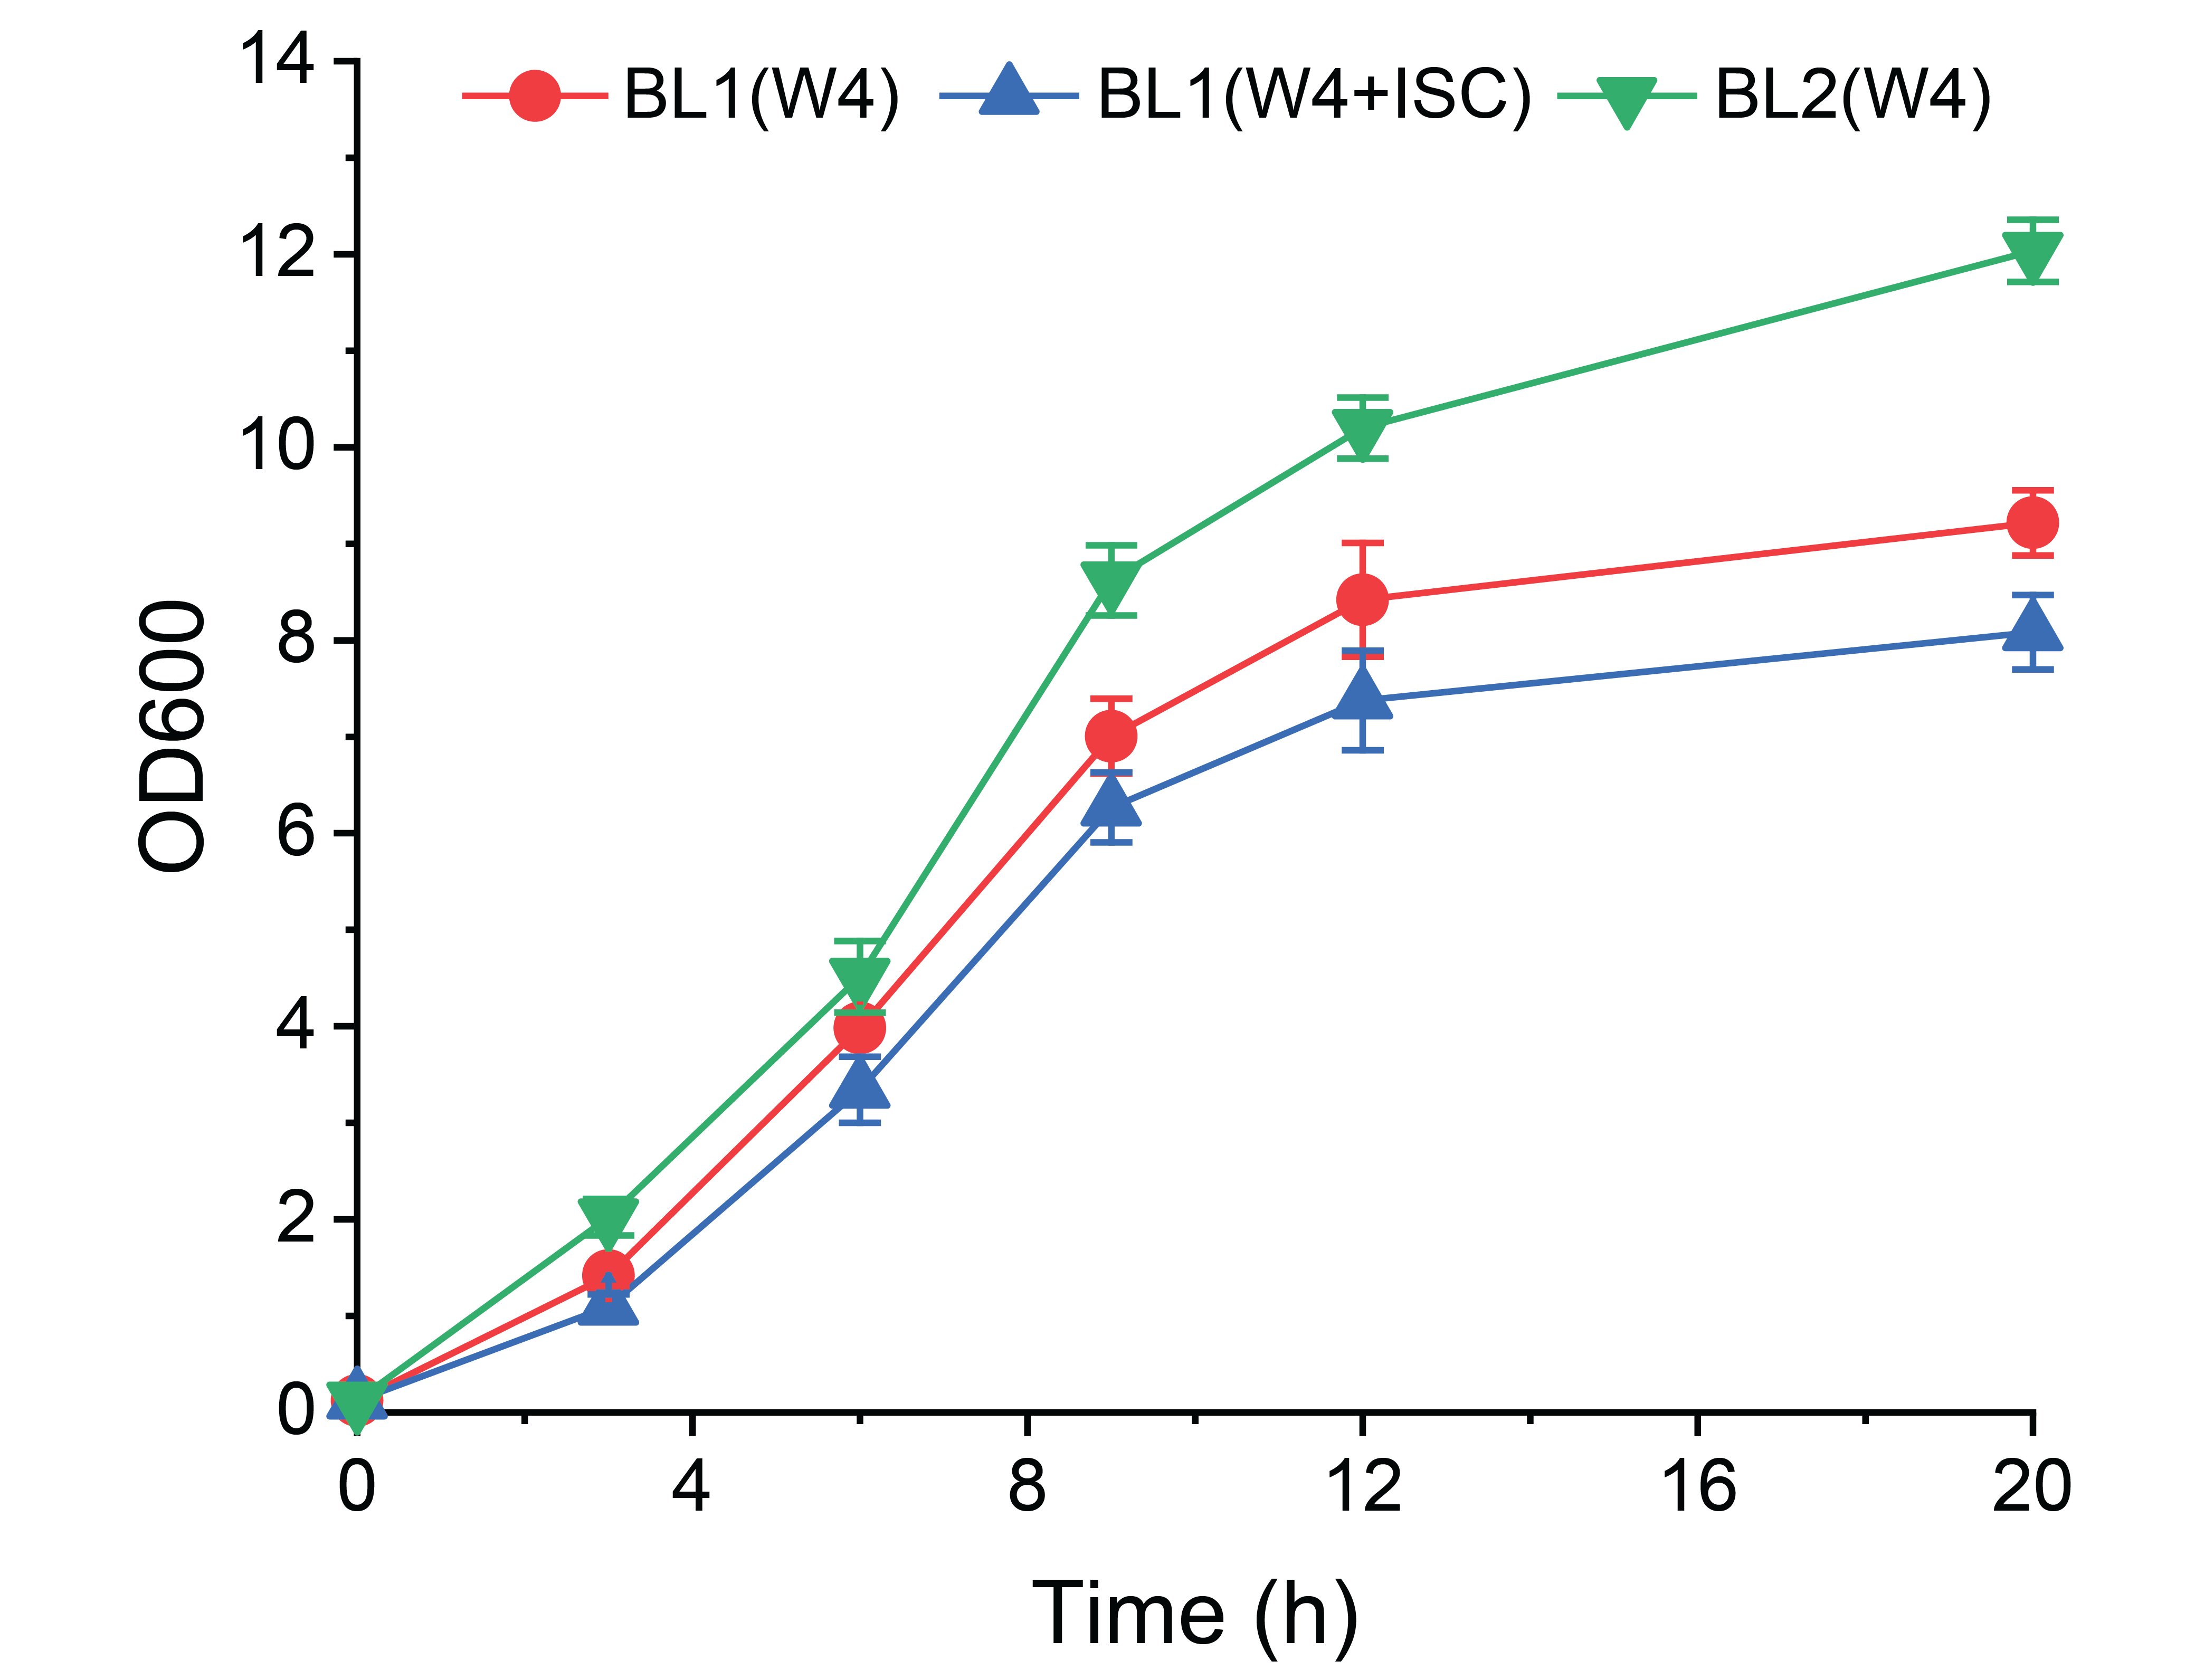


# ****Figure S5.**** Growth profiles of engineered *E. coli* strains used for MeFDH1 production.

Cell growth of BL1(W4) (expressing *moeA1*, *mobA*, *mobB* and *fdhD* with a chromosomally integrated *tupBCA*), BL1(W4+ISC) (BL1 carrying a plasmid-borne *isc* operon, pRKISC), and BL2(W4) (BL1 with a chromosomally upregulated *isc* operon) was monitored by OD600 over time. Data represent mean ± s.d. (n = 3).


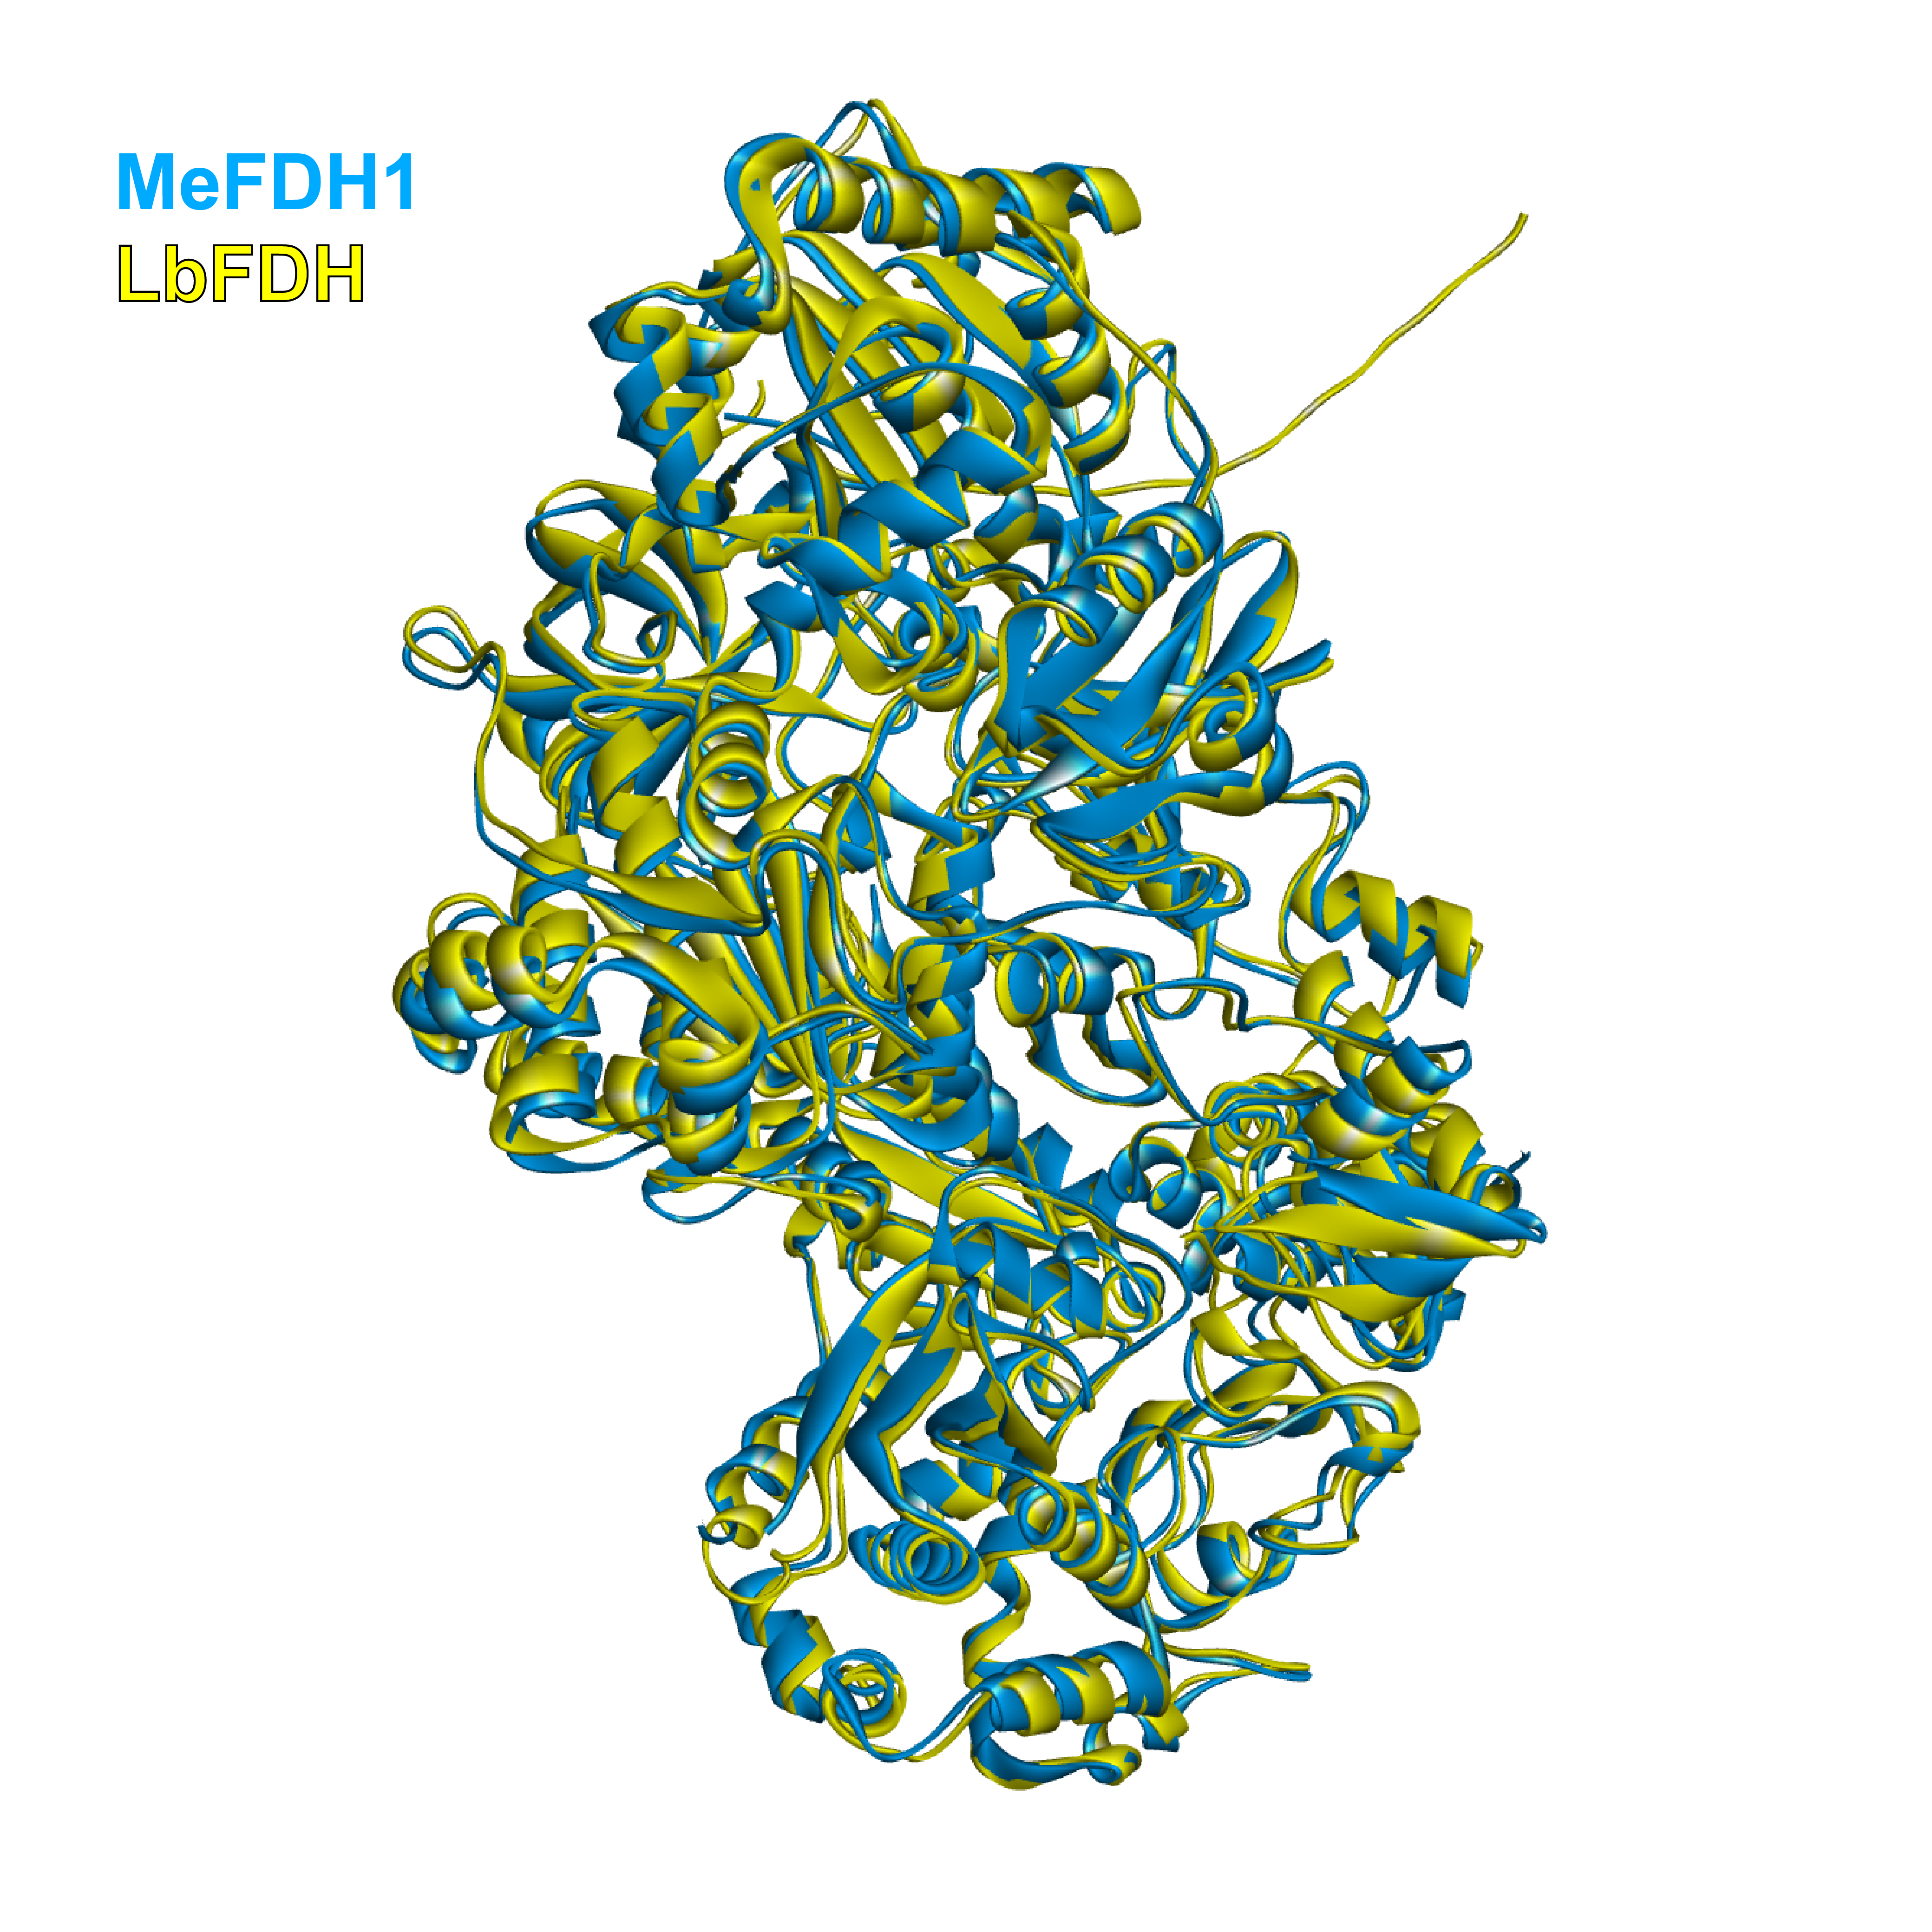


# Figure S6. Structural comparison of MeFDH1 and a putative FDH from *Lutibaculum* baratangense ****AMV1 (LbFDH).****

A putative tungsten-dependent formate dehydrogenase (LbFDH) was identified through Foldseek structural homology search. Predicted structural models of MeFDH1 (blue) and LbFDH (yellow) were aligned to assess overall fold conservation.


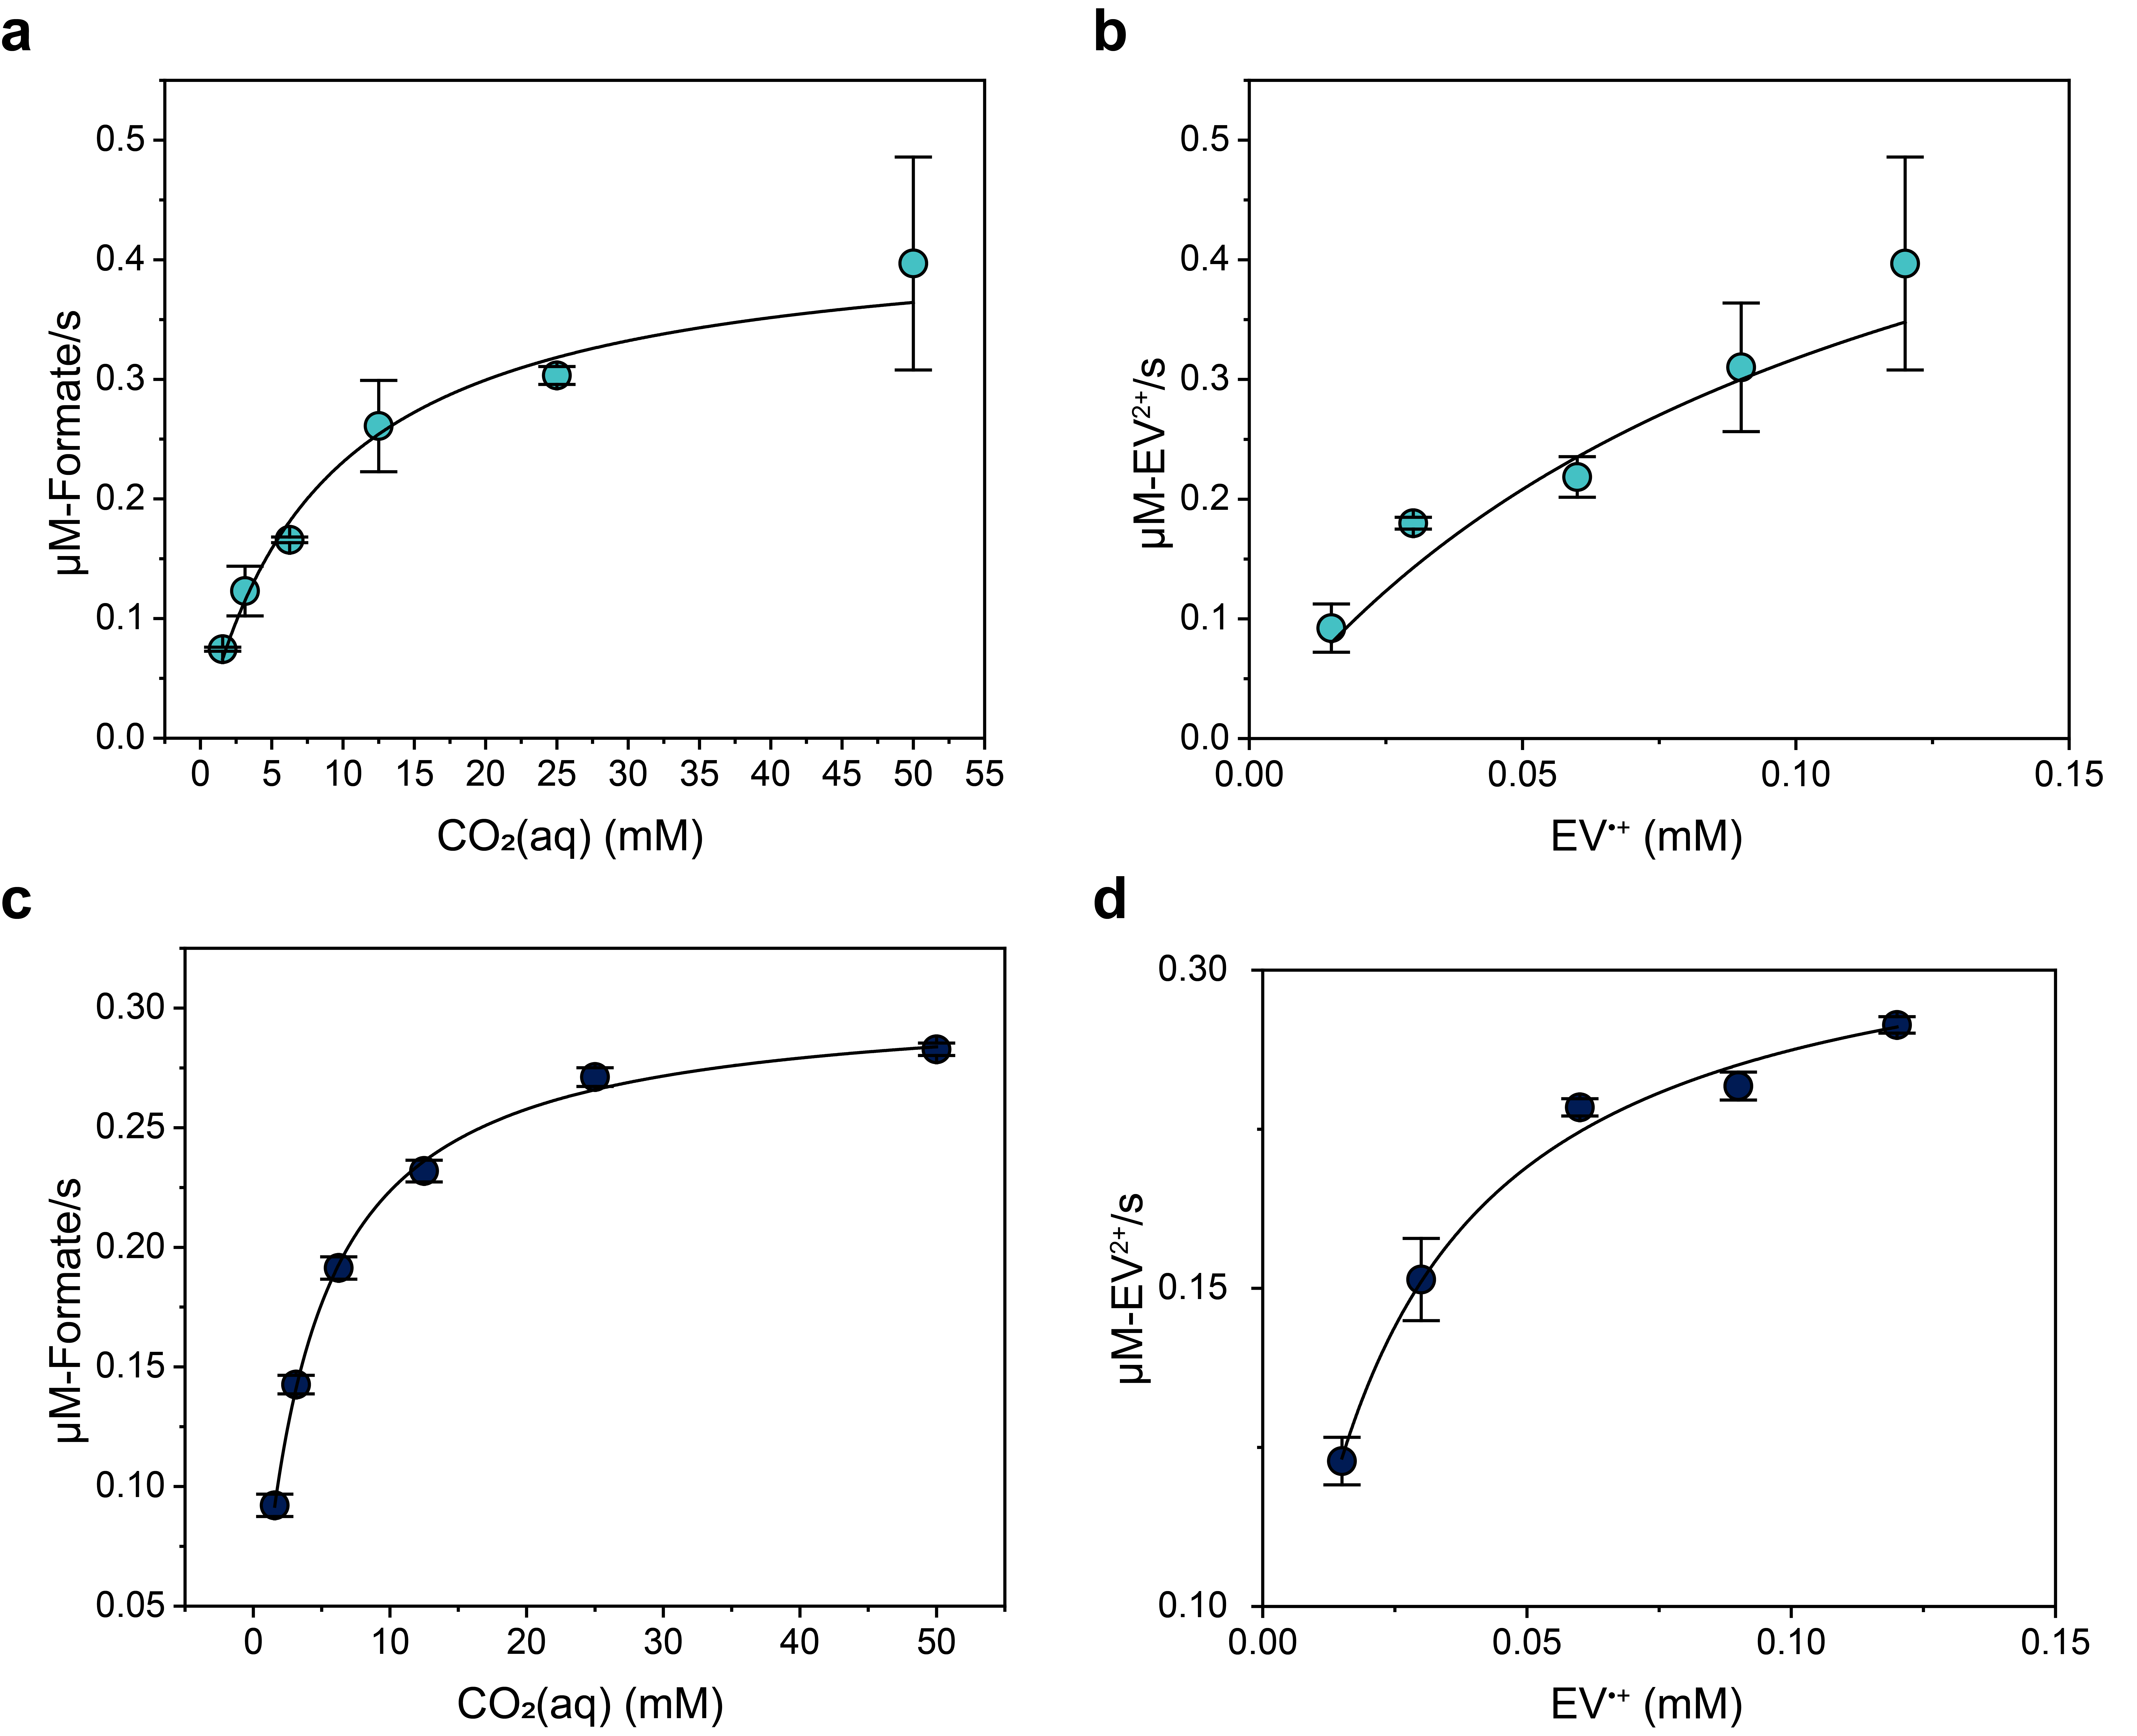


# Figure S7. CO₂-reduction kinetics of MeFDH1 expressed in engineered *E. coli* BL2 (emerald) compared with the native enzyme from *M. extorquens* AM1 (navy).

**a,b,** Michaelis–Menten kinetics of CO₂ reduction by MeFDH1 purified from BL2 using dissolved CO₂ (**a**) or reduced ethyl viologen (EV•⁺; **b**) as the electron mediator.

**c,d,** Corresponding CO₂-reduction kinetics of MeFDH1 purified from the native AM1 host using dissolved CO₂ (**c**) or EV•⁺ (**d**). Data represent mean ± s.d.(n = 3).
